# Supplementary material for: The use of urinary proteomics in the assessment of suitability of mouse models for ageing
Source: PLoS One. 2017 Feb 15;12(2):e0166875. doi: 10.1371/journal.pone.0166875 (PMC5310860; doi:10.1371/journal.pone.0166875)
Supplement: S1 Table — 1 means human, 2 means mouse and 1, 2 means human and mouse. (XLS) [file pone.0166875.s001.xls]

## Sheet: Tabelle1
Peptide ID	rho factor	adj. p-value	Sequence	Prot_Accession	Protein Name	StartAA	StopAA	Species
35851	-0.787275	3.07838e-16	GSPGAKGEVGpAGSPGSNGSPGQRGEpGpQ	P08121	Collagen alpha-1(III) chain	344	373	1.2
27161	-0.738783	2.49771e-13	GQpGAKGEpGDTGVKGDAGPpGP	P11087	Collagen alpha-1(I) chain	810	832	1.2
26939	-0.680066	9.47867e-11	GQPGAKGEpGDTGVKGDAGPpGP	P11087	Collagen alpha-1(I) chain	810	832	1.2
26257	-0.678061	1.09961e-10	ppGpAGAAGPAGNPGADGQpGAKG	P11087	Collagen alpha-1(I) chain	364	387	1.2
16583	-0.619501	2.14094e-08	GSpGSPGPDGKTGPpGP	P11087	Collagen alpha-1(I) chain	531	547	1.2
20401	-0.581675	3.34431e-07	GLPGppGPpGEGGKQGDQ	P28481	Collagen alpha-1(II) chain	666	683	1.2
33825	-0.576616	4.56765e-07	YKGmVGSIGAAGpPGEEGPRGppGEAG	Q07643	Collagen alpha-2(IX) chain	250	276	1.2
17651	-0.552724	1.7315e-06	DEAGSEAHREGETR	E9PV24	Fibrinogen alpha chain	527	540	2
3902	-0.550675	1.93967e-06	KGTAGEpGKAG	P11087	Collagen alpha-1(I) chain	575	585	1.2
7545	-0.546533	2.50727e-06	AGPpGPTGPTGPp	P11087	Collagen alpha-1(I) chain	320	332	1.2
27744	-0.538422	3.82831e-06	GEpGAKGERGApGEKGEGGPpGP	P08121	Collagen alpha-1(III) chain	818	840	1.2
23846	-0.520164	1.08086e-05	TDEDLTSHMKSGESKES	P10923	Osteopontin	170	186	2
33367	-0.519454	1.11207e-05	LQGMpGERGGpGSpGPKGEKGEpGGAG	P08121	Collagen alpha-1(III) chain	723	749	1.2
29788	-0.51453	1.38277e-05	QGEAGQKGDAGApGpQGpSGApGPQ	P28481	Collagen alpha-1(II) chain	851	875	1.2
16079	-0.493648	3.86019e-05	GQPGAKGEpGDTGVKG	P11087	Collagen alpha-1(I) chain	810	825	1.2
7266	-0.492088	4.16075e-05	GVpGKDGPRGPA	P08121	Collagen alpha-1(III) chain	752	763	1.2
27017	-0.489546	4.65488e-05	DGPpGRDGQpGHKGERGYpG	Q01149	Collagen alpha-2(I) chain	939	958	1.2
10361	-0.488252	4.88287e-05	DGApGAKGDRGET	P11087	Collagen alpha-1(I) chain	1016	1028	1.2
15095	-0.48385	6.09757e-05	GEPGLPGPpGPpGPpG	Q05306	Collagen alpha-1(X) chain	502	517	2
30714	-0.476591	8.78252e-05	SGTTGEVGKpGERGLpGEFGLpGP	Q01149	Collagen alpha-2(I) chain	567	590	1.2
12700	-0.466275	0.000137009	ApGApGPPGSPGPAGp	P28481	Collagen alpha-1(II) chain	1066	1081	1.2
25169	-0.464835	0.000143275	QGIpGTGGPpGENGKpGEpGP	P08121	Collagen alpha-1(III) chain	640	660	1.2
6931	-0.464756	0.000143275	GRpGERGPpGP	P11087	Collagen alpha-1(I) chain	228	238	1.2
1504057	-0.464756	0.000143275	KNGDDGEAGKpGRpGERGPpGP	P11087	Collagen alpha-1(I) chain	217	238	1.2
19556	-0.447566	0.000292891	GEAGKPGRpGERGPpGP	P11087	Collagen alpha-1(I) chain	222	238	1.2
3390	-0.44442	0.000338012	PGYPGPpGpP	Q0VF58	Collagen alpha-1(XIX) chain	832	841	2
30946	-0.43401	0.000488012	NIGFPGPKGpSGDpGKPGERGHpG	Q01149	Collagen alpha-2(I) chain	497	520	1.2
18066	-0.427938	0.000620446	SpGSPGPDGKTGPpGPAG	P11087	Collagen alpha-1(I) chain	532	549	1.2
19691	-0.426529	0.000654276	SpGEAGRpGEAGLpGAKG	P11087	Collagen alpha-1(I) chain	511	528	1.2
14707	-0.425224	0.00067968	GpPGLpGPpGPpGPPG	O35206	Collagen alpha-1(XV) chain	917	932	2
18294	-0.423079	0.000725607	DGRPGpIGPAGPRGEAG	Q01149	Collagen alpha-2(I) chain	480	496	1.2
33810	-0.420563	0.000792995	KNGETGPQGPpGPTGPAGDKGDSGPpGP	P08121	Collagen alpha-1(III) chain	609	636	1.2
18875	-0.41959	0.000812062	TGSpGSpGPDGKTGPpGP	P11087	Collagen alpha-1(I) chain	530	547	1.2
27388	-0.417994	0.000855965	GQpGAKGEpGDTGVKGDAGppGP	P11087	Collagen alpha-1(I) chain	810	832	1.2
37057	-0.416317	0.000905708	NSGEpGApGNKGDTGAKGEpGATGVQGPpGP	P11087	Collagen alpha-1(I) chain	421	451	1.2
16415	-0.414122	0.000987912	KNGDDGEAGKpGRpG	P11087	Collagen alpha-1(I) chain	217	231	1.2
35125	-0.414002	0.000989974	REGSpGAEGSpGRDGApGAKGDRGETGP	P11087	Collagen alpha-1(I) chain	1003	1030	1.2
29571	-0.40827	0.00118333	IGFpGPKGPSGDpGKpGERGHpG	Q01149	Collagen alpha-2(I) chain	498	520	1.2
27773	-0.406786	0.0011865	RSGETGPVGppGSPGPPGPPGPPG	P28481	Collagen alpha-1(II) chain	1192	1215	1.2
27230	-0.406182	0.00121528	TETIEGADAEDGHSPGEQQK	P04186	Complement factor B	236	255	2
19345	-0.39693	0.00165482	GSpGSpGPDGKTGPpGPAG	P11087	Collagen alpha-1(I) chain	531	549	1.2
10352	-0.392652	0.00192234	GQpGPpGPpGApGP	P08121	Collagen alpha-1(III) chain	1181	1194	1.2
9421	-0.391632	0.00199409	VGEpGPEGPAGND	Q3U962	Collagen alpha-2(V) chain	1041	1053	1.2
9877	-0.387307	0.00229813	PGAKGEpGDTGVK	P11087	Collagen alpha-1(I) chain	812	824	1.2
38376	-0.386169	0.00238696	ESGREGSpGAEGSpGRDGApGAKGDRGETGP	P11087	Collagen alpha-1(I) chain	1000	1030	1.2
23151	-0.385471	0.00243768	AGTQVDVGGSAQKVAGPDPS	Q8BZW2	Ankyrin repeat domain-containing protein SOWAHB	113	132	2
24239	-0.383797	0.00258466	ETGPAGRpGEVGPpGPpGPAG	P11087	Collagen alpha-1(I) chain	901	921	1.2
17228	-0.382848	0.00264424	KGDpGpAGLpGKDGpP	O88207	Collagen alpha-1(V) chain	1038	1053	2
19004	-0.38149	0.00275809	GAGpPGpEGGKGpAGPpGP	P08121	Collagen alpha-1(III) chain	696	714	1.2
19814	-0.380045	0.00287371	GLPGpAGPpGEAGKpGEQ	P11087	Collagen alpha-1(I) chain	633	650	1.2
23042	-0.377561	0.00313773	pGEpGEPGVSGPMGpRGpP	P28481	Collagen alpha-1(II) chain	227	245	1.2
31189	-0.372558	0.00368305	NIGFpGPKGPSGDpGKpGERGHpG	Q01149	Collagen alpha-2(I) chain	497	520	1.2
16886	-0.371443	0.00380957	GSpGSpGPDGKTGPpGP	P11087	Collagen alpha-1(I) chain	531	547	1.2
17232	-0.370979	0.0038485	KpGEQGVpGDLGApGP	P11087	Collagen alpha-1(I) chain	646	661	1.2
15040	-0.37025	0.00393677	GPpGApGpQGFQGPp	P11087	Collagen alpha-1(I) chain	180	194	1.2
4572	-0.367091	0.004273	ESLLNGGITI	Q8BLR9	Hypoia-inducible factor 1-alpha inhibitor	282	291	2
31188	-0.364493	0.00460157	PEEVSKDNPKFMDTVAEKALQ	Q06890	Clusterin	419	439	1.2
30039	-0.355704	0.00589945	LGPYVAVFDRGDKNVGPRVGLA	O09043	Napsin-A	373	394	2
1506170	-0.34989	0.00687318	TAGEpGKAGERGLpGPpG	P11087	Collagen alpha-1(I) chain	577	594	1.2
8738	-0.347887	0.00731739	ApGEKGEGGPpGP	P08121	Collagen alpha-1(III) chain	828	840	1.2
1504810	-0.347062	0.00751851	KNGDDGEAGKpGRPGERGpPGP	P11087	Collagen alpha-1(I) chain	217	238	1.2
21212	-0.342561	0.00848699	NGIpGEKGppGERGGpGP	P08121	Collagen alpha-1(III) chain	496	513	1.2
2988	-0.342039	0.00859045	PpGERGGpGP	P08121	Collagen alpha-1(III) chain	504	513	1.2
29842	-0.342011	0.00859045	GMpGERGGpGSpGPKGEKGEpGGAG	P08121	Collagen alpha-1(III) chain	725	749	1.2
5595	-0.341107	0.00875333	GppGAVGApGPQ	Q01149	Collagen alpha-2(I) chain	106	117	1.2
16620	-0.334176	0.0105306	SPGRHEAQEPFLQ	O89023	Tripeptidyl-peptidase 1	293	305	2
1505722	-0.332617	0.010982	GPSGKEGPVGLpG	Q01149	Collagen alpha-2(I) chain	466	478	1.2
1504689	-0.332118	0.0110967	KPPSTmQFDDDDQGPPAPPNPF	Q9QYB5	Gamma-adducin	533	554	2
4170	-0.331986	0.0111323	KpGEQGVPGD	P11087	Collagen alpha-1(I) chain	646	655	1.2
22560	-0.328836	0.012047	GApGLKGENGLpGDNGAPGP	P08121	Collagen alpha-1(III) chain	278	297	1.2
1505126	-0.327279	0.0124436	GEpGRDGTpGGpGIRGMpG	P08121	Collagen alpha-1(III) chain	521	539	1.2
1505438	-0.325944	0.0128899	ApGLpGPRGIpGPAG	Q01149	Collagen alpha-2(I) chain	326	340	1.2
14554	-0.325868	0.0129066	PGPGFAGpPGppGPVG	Q07643	Collagen alpha-2(IX) chain	112	127	1.2
5455	-0.324935	0.0131412	GpPGppGPpGPG	O35206	Collagen alpha-1(XV) chain	707	718	2
20667	-0.321411	0.014196	GEVGPpGPpGpAGEKGSpG	P11087	Collagen alpha-1(I) chain	909	927	1.2
1505118	-0.31571	0.0166691	HFRSVVSLDYMVFFS	Q61618	Adenosine receptor A3	168	182	2
12858	-0.313933	0.0173933	GPpGENGKpGEpGP	P08121	Collagen alpha-1(III) chain	647	660	1.2
1506234	-0.312891	0.0177483	KGEQGpAGPPGFQGLpG	Q01149	Collagen alpha-2(I) chain	549	565	1.2
8824	-0.312096	0.0180899	GVQGppGHPGPPG	Q64739	Collagen alpha-2(I) chain	1486	1498	1.2
1506258	-0.309723	0.019298	GIpGEKGPpGERGGpGP	P08121	Collagen alpha-1(III) chain	497	513	1.2
36597	-0.308257	0.0200299	PGKDGEVGPSGPVGPPGLAGERGEQGppGP	Q3U962	Collagen alpha-2(V) chain	642	671	1.2
21559	-0.306217	0.0210783	GPpGpPGSPGPpGSPAPpGL	Q01149	Collagen alpha-2(I) chain	60	79	1.2
1505611	-0.305719	0.0212502	GRNGEKGETGApG	P08121	Collagen alpha-1(III) chain	269	281	1.2
17249	-0.305239	0.0215391	pGPVGPAGKNGDRGET	P11087	Collagen alpha-1(I) chain	1043	1058	1.2
31210	-0.304971	0.0216928	QNGEpGAKGERGApGEKGEGGPpGP	P08121	Collagen alpha-1(III) chain	816	840	1.2
7041	-0.303095	0.0228268	IQNDVGHPFS	P01132	Pro-epidermal growth factor	686	695	2
27610	-0.302646	0.023073	QGPTGETGPMGERGHPGPPGpP	O88207	Collagen alpha-1(V) chain	1002	1023	2
4687	-0.301773	0.0235039	GpPGpPGPpSGG	P11087	Collagen alpha-1(I) chain	1173	1184	1.2
14834	-0.300675	0.0240342	ISHELESSSSEVN	P10923	Osteopontin	282	294	2
6717	-0.297674	0.0259864	ApGERGPpGTAG	P08121	Collagen alpha-1(III) chain	678	689	1.2
22269	-0.296865	0.0265094	GpPGpPGpPGPpGLGGNFAS	P11087	Collagen alpha-1(I) chain	132	151	1.2
19572	-0.2967	0.0266048	TETAVEESGEAGEDGAP	Q3USH5	Splicing factor; suppressor of white-apricot homolog	525	541	2
25884	-0.296075	0.026997	DGESGRpGRpGERGLpGPpG	P08121	Collagen alpha-1(III) chain	229	248	1.2
13568	-0.294631	0.0280553	TGPPGPpGPPGPPGAP	P25318	Collagen alpha-2(VIII) chain	514	529	2
35924	-0.29282	0.0292376	KNGETGPQGPPGPTGPAGDKGDSGPpGPQG	P08121	Collagen alpha-1(III) chain	609	638	1.2
13566	-0.291832	0.0298638	TSSPGSLGGSPGFGTG	Q7TNC6	Kinesin-like protein KIF26B	94	109	2
14420	-0.291828	0.0298638	PGAKGEpGDTGVKGD	P11087	Collagen alpha-1(I) chain	812	826	1.2
20909	-0.288886	0.0317251	TGSpGSPGPDGKTGPpGPAG	P11087	Collagen alpha-1(I) chain	530	549	1.2
1505421	-0.288743	0.0317743	ATAASPGEGGAGEAEP	Q69Z61	PWWP domain-containing protein 2A	10	25	2
9139	-0.285129	0.0340006	SpGQRGEpGPQG	P08121	Collagen alpha-1(III) chain	363	374	1.2
18625	-0.284806	0.0342405	TGSpGSPGPDGKTGPpGP	P11087	Collagen alpha-1(I) chain	530	547	1.2
14415	-0.280762	0.0372989	DPGPQGPRGPVGPpG	P11087	Collagen alpha-1(I) chain	106	120	1.2
1504650	-0.28067	0.0373485	GPpGKNGDDGEAGKpGRpGERGPpGP	P11087	Collagen alpha-1(I) chain	213	238	1.2
3402	-0.277611	0.0396832	EVGPAGERGP	A2A52	Collagen alpha-4(VI) chain	1647	1656	2
16438	-0.277602	0.0396832	EELDHALNDMTSI	P58771	Tropomyosin alpha-1 chain	272	284	2
20098	-0.27688	0.0403111	PGpPGppGVTGmDGQPGP	O88207	Collagen alpha-1(V) chain	690	707	2
9576	-0.276849	0.0403112	GSpGFDGIQGpPG	Q04857	Collagen alpha-1(VI) chain	346	358	1.2
20580	-0.276641	0.0405197	pGKEGPpGFPGPPGpPGp	P39061	Collagen alpha-1(XVIII) chain	961	978	2
1505741	-0.27509	0.0417554	ERGEQGPAGSpG	P11087	Collagen alpha-1(I) chain	619	630	1.2
20423	-0.274299	0.0424446	PGpPGpSGDQGASGPAGpSG	P28481	Collagen alpha-1(II) chain	1142	1161	1.2
20778	-0.272639	0.0441512	RGLpGPpGNNGNpGPpGP	P08121	Collagen alpha-1(III) chain	877	894	1.2
15377	-0.27178	0.0449033	GIpGTGGPpGENGKpG	P08121	Collagen alpha-1(III) chain	641	656	1.2
11297	-0.269571	0.046858	EQAQEQVQPKP	P06728	Apolipoprotein A-IV	382	392	1.2
1505202	-0.268342	0.0480733	KEINWQmIRIEA	A2RSJ4	UHRF1-binding protein 1-like	181	192	2
35090	0.266479	0.0498751	FIIFEEHTQSPIFVGKVVDPTHK	Q00897	Alpha-1-antitrypsin 1-4	391	413	2
21750	0.266939	0.0493936	PSGSSGSLSTSSSSSPPGTP	P28033	CCAAT/enhancer-binding protein beta	170	189	2
36351	0.267302	0.049017	GPRGRDGEPGTPGNPGPAGPPGppGppGLS	P28481	Collagen alpha-1(II) chain	146	175	1.2
1504983	0.26767	0.0487069	QTSMKHATSVDTSFSKDV	Q8BZN6	Dedicator of cytokinesis protein 10	1249	1266	2
1504926	0.270284	0.046113	AHSLSAPEPYKRWYDVQ	P03953	Complement factor D	83	99	2
25395	0.270661	0.045813	EIYNFKADEIESYLEN	Q8BXN9	Transmembrane protein 87A	92	107	2
1506192	0.271507	0.0450632	SGpTGQKGDSGmPGPpGP	Q61245	Collagen alpha-1(XI) chain	1516	1533	2
32849	0.272092	0.044656	ANLDGSKRRRLIQNDVGHPFSL	P01132	Pro-epidermal growth factor	675	696	2
1504611	0.274689	0.0420952	GIPGTRGpTGppGVpGFPGSKGDPGNPGA	Q05306	Collagen alpha-1(X) chain	446	474	2
1505023	0.275878	0.0412085	LEHYSYVNYHEPRII	Q60841	Reelin	811	825	2
19747	0.276042	0.0410485	DETIEIIVENKVKE	Q9EP95	Resistin-like alpha	24	37	2
1505454	0.277539	0.0397201	KKKLEQEmVLS	Q6WQJ1	Sn1-specific diacylglycerol lipase alpha	440	450	2
1504766	0.279408	0.0383221	EDVQETDTSQKDQSPASHEI	Q00897	Alpha-1-antitrypsin 1-4	25	44	2
27303	0.280092	0.0377656	GAHSLSAPEPYKRWYDVQ	P03953	Complement factor D	82	99	2
8536	0.280655	0.0373485	NKELQNSIID	P61110	Kidney androgen-regulated protein	28	37	2
1505272	0.282445	0.0360837	GRTGTpGLPGpPGPmG	Q60847	Collagen alpha-1(XII) chain	2823	2838	2
1505189	0.28317	0.0355471	RTIPImLVGNKADL	Q5RI75	Ras and EF-hand domain-containing protein homolog	532	545	2
1504731	0.28383	0.0351187	GpQGpTGETGPMGERGHPGPPGpP	O88207	Collagen alpha-1(V) chain	1000	1023	2
7786	0.285198	0.0340006	GPpGPpGPpGPpG	O35206	Collagen alpha-1(XV) chain	704	716	2
1505385	0.285488	0.0339194	LFESIHHGLDDI	A2RSY6	TRMT1-like protein	540	551	2
15289	0.286148	0.0334617	KVERYVESEADL	Q9QZQ0	Neuronal PAS domain-containing protein 3	561	572	2
1505345	0.286448	0.0332574	STMPRGLLLQGQE	P28825	Meprin A subunit alpha	611	623	2
6896	0.287609	0.0324945	KLAEQAERY	P63101	14-3-3 protein zeta/delta	11	19	2
1506106	0.287798	0.032442	mAHLINEKDGETFQL	P02762	Major urinary protein 6	120	134	2
17802	0.288961	0.0316845	pGVSGpMGpRGPpGPAG	P28481	Collagen alpha-1(II) chain	233	249	1.2
1504767	0.28912	0.0315943	YPFIYHAVESSAETTDMPGQ	O88622	Poly(ADP-ribose) glycohydrolase	946	965	2
17147	0.289832	0.0312595	QGEGISWHNIDYT	Q9QY06	Unconventional myosin-IXb	561	573	2
1504974	0.289905	0.0312436	LGLTAPPGSKEAEAQANQQA	Q9JJU8	SH3 domain-binding glutamic acid-rich-like protein	95	114	2
1505078	0.292133	0.0297069	VDKDNGFEAKDAEFPAE	Q52KR3	Protein prune homolog 2	987	1003	2
1505077	0.294	0.028429	YGREPDLSSDIKERFA	P11589	Major urinary protein 2	138	153	2
26850	0.295185	0.0276654	FRELDINSDNAINFEEF	P27005	Protein S100-A8	55	71	2
1504601	0.297184	0.0263582	IANKHTGKDTVRINLHPSFVTPGKL	P01132	Pro-epidermal growth factor	277	301	2
22469	0.299553	0.024677	QREEQAEPDGTEVADK	P13541	Myosin-3	369	384	2
16369	0.300235	0.0242651	EAGSRGPpGSVGENGP	Q30D77	Collagen alpha-1(XXIV) chain	1148	1163	2
29728	0.301459	0.0235708	LGESSRKAMLEESLPSSLGQR	P28825	Meprin A subunit alpha	627	647	2
1505040	0.301621	0.0235295	PLPPVHSASKEITESKAQ	Q6PFE3	DNA repair and recombination protein RAD54B	79	96	2
1506339	0.301758	0.0235039	TLMSPLGITR	P22599	Alpha-1-antitrypsin 1-2	319	328	2
10190	0.301974	0.0234208	LGEQHFKGLVL	P07724	Serum albumin	38	48	2
1505313	0.302091	0.0233597	GPpGPAGSpGERGPAGA	O88207	Collagen alpha-1(V) chain	1081	1097	2
32368	0.302618	0.023073	SGpRGIGTQGpKGDTGQKGLPGPpGP	Q2UY11	Collagen alpha-1(XXVIII) chain	678	703	2
1505734	0.304212	0.0221756	LQGSMLKPSSL	P01132	Pro-epidermal growth factor	727	737	2
17882	0.304847	0.021755	EDHLWVSDWAIPS	P01132	Pro-epidermal growth factor	700	712	2
1504914	0.305772	0.021238	TEQTPKAAAGDGPSASEKEPS	Q8VCR8	Myosin light chain kinase 2, skeletal/cardiac muscle	17	37	2
1504830	0.305996	0.0211641	KGERGFPGPEGpPGSPGLPGVPG	Q63870	Collagen alpha-1(VII) chain	1296	1318	1.2
29943	0.306524	0.020942	EESSSMERNFNVEQISGYW	P04939	Major urinary protein 3	23	41	2
9415	0.309752	0.019298	VGPRVGLARAQS	O09043	Napsin-A	387	398	2
25768	0.310102	0.0191503	SGNFIDQTRVLNLGPITR	Q91X17	Uromodulin	590	607	1.2
39954	0.310578	0.0188994	SPALGESSRKAmLEESLPSSLGQRHPSRQ	P28825	Meprin A subunit alpha	624	652	2
1504986	0.312134	0.0180882	RVVLENEAVRAAAVSALAK	Q9QXK3	Coatomer subunit gamma-2	479	497	2
10236	0.312296	0.0180557	LNSVFDQLGSY	P61110	Kidney androgen-regulated protein	39	49	2
23180	0.313957	0.0173933	QGGEVPYTTLATRMMMG	Q61625	Glutamate receptor ionotropic, delta-2	619	635	2
1506290	0.314435	0.0172752	FQSPTYTQPHQGPS	Q91X17	Uromodulin	464	477	1.2
19888	0.314905	0.0170291	TIPKTDYDNFLMAH	P11589	Major urinary protein 2	109	122	2
8016	0.315963	0.0165825	VFGETTNSLSV	Q60847	Collagen alpha-1(II) chain	2035	2045	1.2
17875	0.317311	0.015972	FVEAVEQDTLQEF	Q91VW3	SH3 domain-binding glutamic acid-rich-like protein 3	77	89	2
1504698	0.318692	0.0153325	GQKGIpGDPAFGDpGPPGERGLpGA	Q9QZR9	Collagen alpha-4(IV) chain	746	770	2
1504817	0.3197	0.0148897	ALDYDPVESKIYFAQTALK	P01132	Pro-epidermal growth factor	522	540	2
16043	0.320993	0.0143438	NDLGEQHFKGLVL	P07724	Serum albumin	36	48	2
26713	0.322035	0.0139517	GPpGEGKVGEpGSAGPTGpPGVp	P25318	Collagen alpha-2(VIII) chain	486	508	2
1505834	0.32272	0.0137521	KVVDPTHK	P07758	Alpha-1-antitrypsin 1-1	406	413	1.2
1504920	0.324573	0.013281	MLEESLPSSLGQRHPSRQ	P28825	Meprin A subunit alpha	635	652	2
2141	0.325289	0.0130615	LVSINKEL	P61110	Kidney androgen-regulated protein	24	31	2
1504629	0.326588	0.012675	pGKQGLYGpPGPKGDpGPAGQKGQAGE	Q8BLX7	Collagen alpha-1(XVI) chain	1331	1357	1.2
22405	0.327956	0.0122051	QGDPGEDGRNGSPGSSGPK	Q63870	Collagen alpha-1(VII) chain	1672	1690	1.2
1505595	0.328773	0.012047	SINKELQNSII	P61110	Kidney androgen-regulated protein	26	36	2
21108	0.329596	0.0118332	QGPpGPPGPPGPSGpLGHP	Q9R1N9	Collagen alpha-1(XIII) chain	276	294	2
695	0.329797	0.0117723	IDQTRVL	Q9117	Uromodulin	594	600	1.2
1505568	0.330873	0.0115093	AAVLNPDYRQE	P07361	Alpha-1-acid glycoprotein 2	49	59	2
1506153	0.332297	0.0110586	ELKYARGKEAIEAQL	Q9D0F1	Kinetochore protein NDC80 homolog	398	412	2
10951	0.33306	0.0108743	KQQQEQQQKP	Q9JJN2	Zinc finger homeobox protein 4	3269	3278	2
15379	0.334557	0.0104501	NVEKINGEWHTI	P11589	Major urinary protein 2	29	40	2
1504953	0.33836	0.0094723	GERGHPGPPGPPGEQGLpGAAG	O88207	Collagen alpha-1(V) chain	1012	1033	2
6864	0.340515	0.00888755	FIDQTRVLN	Q91X17	Uromodulin	593	601	1.2
10734	0.340935	0.00879242	GLTGppGPpGpPGP	P25318	Collagen alpha-2(VIII) chain	512	525	2
1504826	0.341937	0.00860018	DVQSVVPHPGSRPDSLEDDL	P03953	Complement factor D	97	116	2
1505687	0.342688	0.00846121	AVDPIERLMF	P01132	Pro-epidermal growth factor	171	180	2
1504771	0.344752	0.00798028	AEKYSQKEDKYEEEIKVL	P58771	Tropomyosin alpha-1 chain	211	228	2
1504951	0.345578	0.00781162	GPPGPpGPpGSAGARGEPGPGGR	Q60847	Collagen alpha-1(XII) chain	2944	2966	2
1505522	0.350011	0.00685388	QPGLpGApGQAGAPG	P25318	Collagen alpha-2(VIII) chain	208	222	2
17462	0.351023	0.00667828	TLQRFKDVAEVQT	Q5S006	Leucine-rich repeat serine/threonine-protein kinase 2	634	646	2
1506391	0.351463	0.0066029	RTYHDGVVT	P03953	Complement factor D	183	191	2
18643	0.352126	0.00647774	IDQTRVLNLGPITR	Q91X17	Uromodulin	594	607	1.2
3982	0.353159	0.00632523	FIDQTRVL	Q91X17	Uromodulin	593	600	1.2
42192	0.353648	0.00623153	GTDRRLNVWDLSKIGEEQSPEDAEDGPPELL	Q60972	Histone-binding protein RBBP4	337	367	2
1504549	0.353824	0.00620127	SPALGESSRKAMLEESLPSSLGQRHPSRQK	P28825	Meprin A subunit alpha	624	653	2
1504957	0.354002	0.00620127	IANKHTGKDTVRINLHPS	P01132	Pro-epidermal growth factor	277	294	2
1504728	0.35493	0.00603182	SVVPHPGSRPDSLEDDLILFK	P03953	Complement factor D	100	120	2
1504622	0.355328	0.00596298	WYDVQSVVPHPGSRPDSLEDDLI	P03953	Complement factor D	95	117	2
31312	0.355929	0.00589138	SGPTKSLLQTPPPPPPPPPPPSSL	Q9JJN2	Zinc finger homeobox protein 4	3088	3111	2
1506478	0.356433	0.00580059	RPDVLHQL	P03953	Complement factor D	163	170	2
37703	0.357252	0.00572397	LGESSRKAMLEESLPSSLGQRHPSRQ	P28825	Meprin A subunit alpha	627	652	2
33077	0.357509	0.00569059	IIFEEHSQSPLFVGKVVDPTHK	Q00898	Alpha-1-antitrypsin 1-5	392	413	2
31104	0.357581	0.00569059	NKRTGQNRVRLQGSMLKPSSL	P01132	Pro-epidermal growth factor	717	737	2
1506151	0.35845	0.00555112	KHPSNIAVDPIERLM	P01132	Pro-epidermal growth factor	165	179	2
7433	0.358534	0.00554347	FASPSRVRLP	E9PVD3	Protocadherin-16	1539	1548	2
25741	0.359623	0.00537715	VSINKELQNSIIDLLNSV	P61110	Kidney androgen-regulated protein	25	42	2
6790	0.359978	0.00533448	ERIAGEASRL	Q64478	Histone H2B type 1-H	72	81	2
1505393	0.361511	0.00506722	TDKLKEAETRAE	P21107	Tropomyosin alpha-3 chain	230	241	2
7067	0.363308	0.00477214	NSLGEKAEPVA	Q64028	Polyhomeotic-like protein 1	685	695	2
6278	0.36522	0.00448153	ARDSLSLSSGS	P56974	Pro-neuregulin-2, membrane-bound isoform	665	675	2
1506293	0.365443	0.00446004	GPpGDPGLmGERGEDG	Q04857	Collagen alpha-1(VI) chain	496	511	1.2
1505616	0.366474	0.00433443	EQIDNLQRVK	Q5SX39	Myosin-4	1209	1218	2
27422	0.366989	0.00428155	LVSINKELQNSIIDLLNSV	P61110	Kidney androgen-regulated protein	24	42	2
7839	0.367281	0.00424962	LEINPDHPIV	P11499	Heat shock protein HSP 90-beta	626	635	2
1505261	0.371594	0.00379518	FSPAKLTNSQAKVL	Q5ND34	WD repeat-containing protein 81	246	259	2
21050	0.373256	0.00360473	SPASHEIATNLGDFAIS	P07758	Alpha-1-antitrypsin 1-3	38	54	2
8132	0.374074	0.00351092	LVSINKELQN	P61110	Kidney androgen-regulated protein	24	33	2
1505686	0.374613	0.00345807	LSVSASIGGETGL	Q80W93	Hydrocephalus-inducing protein	2230	2242	2
33329	0.374864	0.00343078	KGLpGLPGLPGADGLRGPpGIPGPNGE	Q9QZR9	Collagen alpha-4(IV) chain	861	887	2
23764	0.375526	0.00335873	RLLPmERINLRNTSF	Q8CDG1	Piwi-like protein 2	564	578	2
30418	0.380063	0.00287371	KNSYATTENKTLPRSSSMAAGL	Q8BKX1	Brain-specific angiogenesis inhibitor 1-associated protein 2	351	372	2
26903	0.380121	0.00287371	SPALGESSRKAMLEESLPSS	P28825	Meprin A subunit alpha	624	643	2
1505449	0.382363	0.00267581	GQQDRGVAQFTGS	Q6T264	Mastermind-like protein 1	741	753	2
4975	0.382682	0.00265171	SINKELQNS	P61110	Kidney androgen-regulated protein	26	34	2
12310	0.383132	0.00261956	SDHYPVEVTLR	P49183	Deoxyribonuclease-1	272	282	2
21415	0.383415	0.00259712	VPHPGSRPDSLEDDLI	P03953	Complement factor D	102	117	2
18775	0.384167	0.00255133	DLQAEEDKVNTLTK	Q91Z83	Myosin-7	1009	1022	2
19279	0.384577	0.00251422	pSTSTPDLGpPGpPGpP	Q9QZS0	Collagen alpha-3(IV) chain	647	663	1.2
1505209	0.387853	0.00225714	VEKEKHATENKVK	Q5SX39	Myosin-4	968	980	2
1505128	0.388616	0.00220198	TEDAAKDPDPELLKQR	P01132	Pro-epidermal growth factor	312	327	2
1504843	0.388802	0.00219276	SLHELGHFDIPALSDPASLQ	Q66JZ4	T-cell activation inhibitor, mitochondrial	382	401	2
1505252	0.389837	0.00212825	INKELQNSIIDLL	P61110	Kidney androgen-regulated protein	27	39	2
33314	0.390371	0.00209129	IIFEEHTQSPIFVGKVVDPTHK	P22599	Alpha-1-antitrypsin 1-2	392	413	2
31237	0.390576	0.00207845	ANLDGSKRRRLIQNDVGHPFS	P01132	Pro-epidermal growth factor	675	695	2
32002	0.394873	0.00177528	EESSSMERNFNVEQISGYWF	P04939	Major urinary protein 3	23	42	2
1506196	0.399972	0.00150616	TEDAAKDPDPELLKQ	P01132	Pro-epidermal growth factor	312	326	2
12799	0.401137	0.00145091	TDMTGKNSRVLL	P01132	Pro-epidermal growth factor	150	161	2
21734	0.404532	0.0012889	SSLKHPSNIAVDPIER	P01132	Pro-epidermal growth factor	162	177	2
1504643	0.407491	0.00118333	SFQVSDEQYPDATDEDLTSHMK	P10923	Osteopontin	158	179	2
25305	0.408495	0.00118333	GPSGPPGPQGppGQGSPGPKGE	Q2UY11	Collagen alpha-1(XXVIII) chain	461	482	2
1504747	0.40981	0.00113941	IQGDRGDPGppGLpGSRGAQGSPG	Q9QZR9	Collagen alpha-4(IV) chain	177	200	2
25859	0.411192	0.00109156	SSLKHPSNIAVDPIERLM	P01132	Pro-epidermal growth factor	162	179	2
1506231	0.413094	0.00102146	INKELQNSIIDLLN	P61110	Kidney androgen-regulated protein	27	40	2
14909	0.414308	0.000986233	PEEVSKDNPKFM	Q06890	Clusterin	419	430	1.2
16362	0.415774	0.000925363	DQTRVLNLGPITR	Q91X17	Uromodulin	595	607	1.2
1506309	0.417098	0.000876712	ESTVVNQERSRKK	Q8BQ33	Treslin	548	560	2
16425	0.41927	0.00081545	SINKELQNSIIDL	P61110	Kidney androgen-regulated protein	26	38	2
3736	0.423023	0.000725607	VLNLGPITR	Q9117	Uromodulin	599	607	1.2
1505120	0.423279	0.000725607	SRLLPKDVVDTVLDVY	Q5SSE9	ATP-binding cassette sub-family A member 13	1734	1749	2
1505569	0.423995	0.000711915	LDKENALDRAE	P58771	Tropomyosin alpha-1 chain	13	23	2
9209	0.426323	0.000655452	AEFHEKTRAL	P07759	Serine protease inhibitor A3K	150	159	2
1504758	0.426723	0.000650895	LEQQVDDLEGSLEQEKKLR	Q5SX39	Myosin-4	1031	1049	2
19164	0.428801	0.000604061	PRIESASLQGSDRVL	P01132	Pro-epidermal growth factor	627	641	2
1506189	0.431094	0.00055018	EVSSINQEALVLTAKA	Q9JKP8	Chromatin accessibility complex protein 1	33	48	2
16082	0.431984	0.000533785	LVSINKELQNSII	P61110	Kidney androgen-regulated protein	24	36	2
1506219	0.436279	0.000446434	TVKKLAAAASAPGRAKT	Q7TSG5	SH3 domain-containing protein 21	157	173	2
1504648	0.436676	0.00043974	pKGNMGPQGEPGPPGQQGNPGPQGLp	Q61245	Collagen alpha-1(XI) chain	675	700	2
24757	0.438811	0.000403124	VELSSQASKEAALMNQEV	Q99L00	HAUS augmin-like complex subunit 8	330	347	2
1505208	0.439554	0.000394489	TEDAAKDPDPELLK	P01132	Pro-epidermal growth factor	312	325	2
39800	0.447454	0.000292933	SPALGESSRKAMLEESLPSSLGQRHPSRQ	P28825	Meprin A subunit alpha	624	652	2
6299	0.448273	0.000285281	VGKVVDPTHK	Q00897	Alpha-1-antitrypsin 1-4	404	413	2
1505395	0.45053	0.000262239	NELRVAPEEHPV	P60710	Actin, cytoplasmic 1	92	103	2
1505216	0.455691	0.000207442	THRQRFLFSLTQ	Q8JZX3	POC1 centriolar protein homolog A	132	143	2
1504738	0.462603	0.000156267	ANLDGSKRRRLIQNDVGHPF	P01132	Pro-epidermal growth factor	675	694	2
1506176	0.465703	0.000139543	KETSATGPDSRSKIVL	Q6A098	Selenocysteine insertion sequence-binding protein 2-like	198	213	2
17971	0.471147	0.00011374	ARIEELEEEIEAE	P13541	Myosin-3	1114	1126	2
21125	0.479327	7.64645e-05	YAVVSFTYKDDVQTP	Q69ZR9	Protein TASOR	315	329	2
1504932	0.485994	5.44327e-05	KYSQKEDKYEEEIKVL	P58771	Tropomyosin alpha-1 chain	213	228	2
19041	0.49464	3.70231e-05	VVPHPGSRPDSLEDD	P03953	Complement factor D	101	115	2
24211	0.495258	3.60006e-05	VSINKELQNSIIDLLNS	P61110	Kidney androgen-regulated protein	25	41	2
23090	0.504085	2.2769e-05	VLLQmGLHVLAVNGmLV	Q8BW10	RNA-binding protein NOB1	235	251	2
18703	0.508515	1.82531e-05	SINKELQNSIIDLL	P61110	Kidney androgen-regulated protein	26	39	2
13783	0.508726	1.82531e-05	SINKELQNSIID	P61110	Kidney androgen-regulated protein	26	37	2
40511	0.512317	1.52422e-05	EDVQETDTSQKDQSPASHEIATNLGDFAIS	P07758	Alpha-1-antitrypsin 1-2	25	54	2
36709	0.512932	1.48177e-05	EAHKSEIAHRYNDLGEQHFKGLVL	P07724	Serum albumin	25	48	2
33535	0.518449	1.15194e-05	IIFEEHTQSPIFLGKVVDPTHK	P07758	Alpha-1-antitrypsin 1-1	392	413	1.2
20143	0.519356	1.11207e-05	QEELPALLKVLVSEL	Q6PFY1	F-BAR and double SH3 domains protein 1	225	239	2
9689	0.520939	1.04074e-05	TDMTGKNSRVL	P01132	Pro-epidermal growth factor	150	160	2
9801	0.524602	8.31937e-06	EVGNVTLNLLPG	Q8R3N2	Major facilitator superfamily domain-containing protein 6-like	201	212	2
27944	0.532703	5.26613e-06	EEHTQSPIFVGKVVDPTHK	Q00897	Alpha-1-antitrypsin 1-2	395	413	2
33462	0.533426	5.08417e-06	SPALGESSRKAMLEESLPSSLGQR	P28825	Meprin A subunit alpha	624	647	2
2820	0.542711	2.98483e-06	SLNEKLQN	Q640L5	Coiled-coil domain-containing protein 18	1069	1076	2
1505441	0.559603	1.15321e-06	ELQNSIIDLLNS	P61110	Kidney androgen-regulated protein	30	41	2
13387	0.564457	9.15039e-07	VSINKELQNSII	P61110	Kidney androgen-regulated protein	25	36	2
25961	0.572078	5.9935e-07	LVSINKELQNSIIDLLNS	P61110	Kidney androgen-regulated protein	24	41	2
22456	0.5971	1.14947e-07	SINKELQNSIIDLLNS	P61110	Kidney androgen-regulated protein	26	41	2
6624	0.598585	1.07389e-07	AAPEIILGNPV	Q0KL02	Triple functional domain protein	2962	2972	2
10290	0.693864	2.5354e-11	LVSINKELQNS	P61110	Kidney androgen-regulated protein	24	34	2
28150	0.697086	1.92247e-11	EEHTQSPIFLGKVVDPTHK	P07758	Alpha-1-antitrypsin 1-1	395	413	1.2
7489	0.709441	6.35322e-12	VSINKELQNS	P61110	Kidney androgen-regulated protein	25	34	2
20751	0.716739	3.00497e-12	MPSLVVVSGGNSLNNLI	Q4U2R1	E3 ubiquitin-protein ligase HERC2	2846	2862	2
